# Supplementary material
Source: PubMed Central journal article supplement (PMC10793876)
Supplement: NIHMS1952438-supplement-Figure_S1.pdf [file NIHMS1952438-supplement-Figure_S1.pdf]

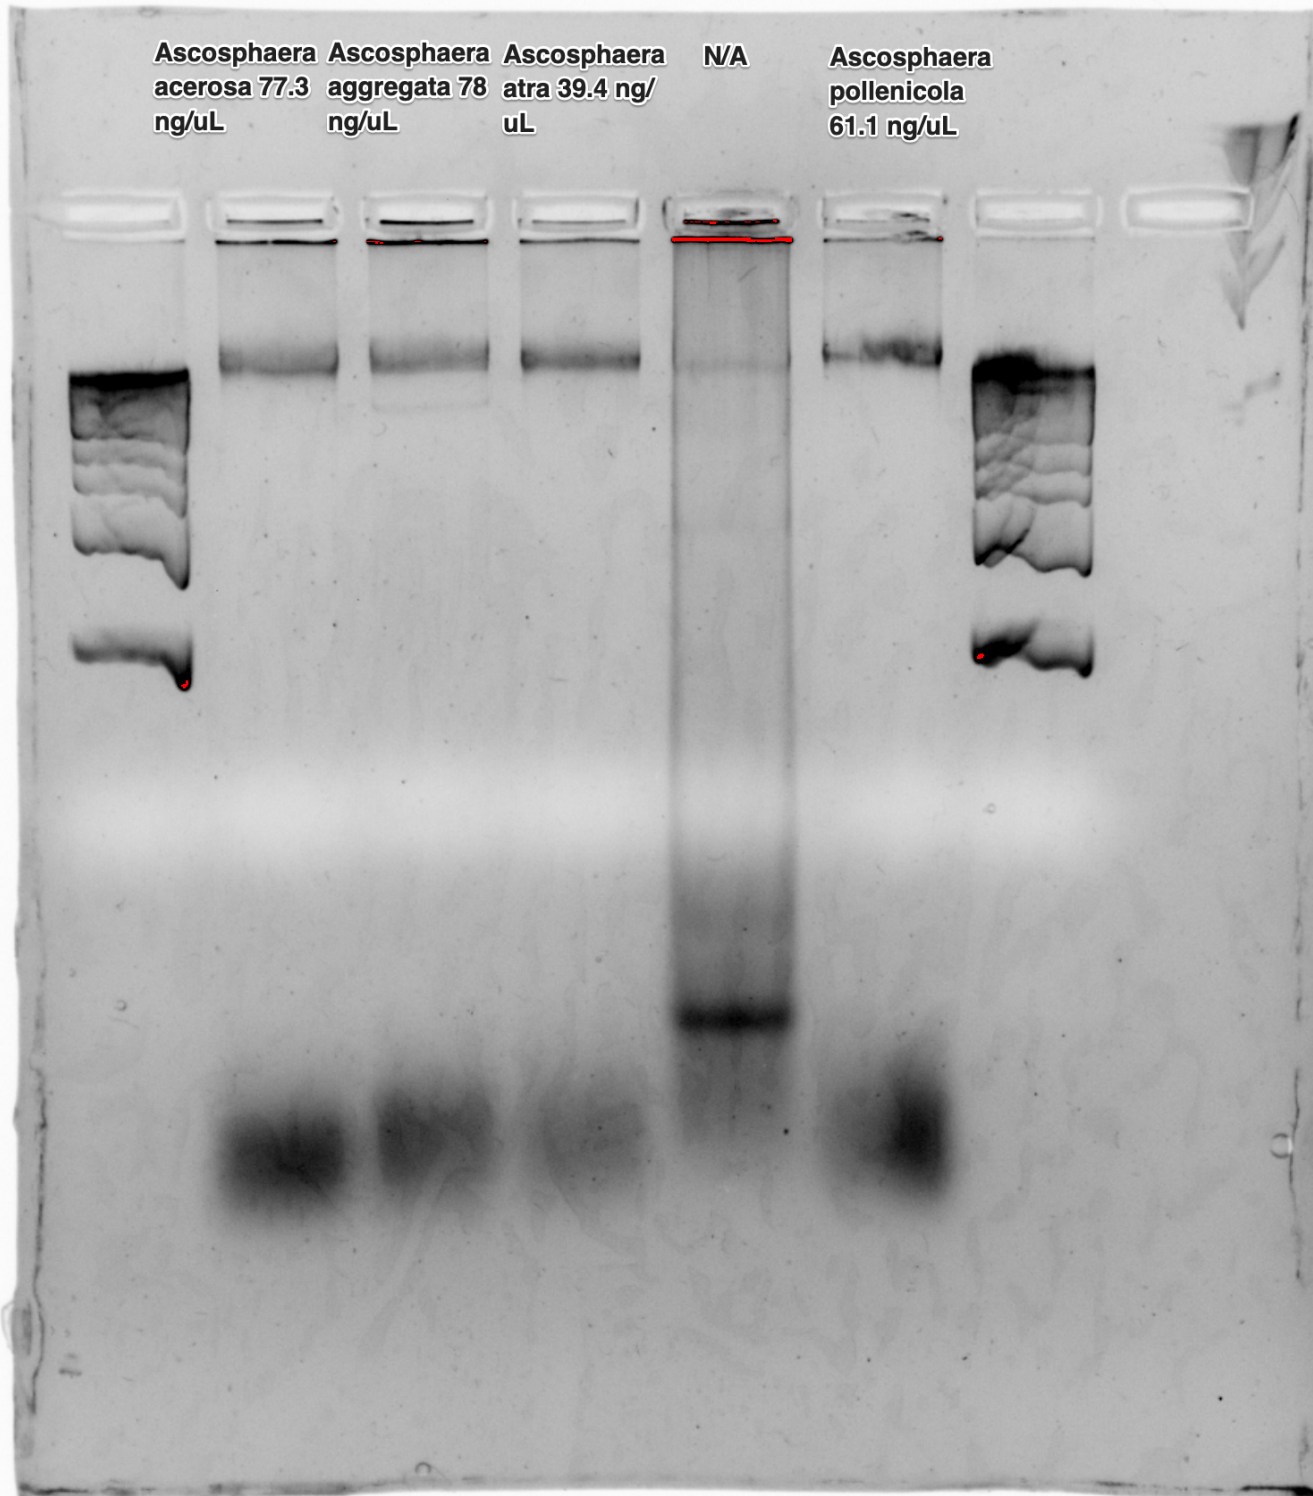

Supplementary Figure 1:  
DNA concentrations and gel image from the DNA extractions for *A. aggregata*, *A. pollenicola*, *A. acerosa*, and *A. atra*. The concentration values above each well were measured with a Qubit. The gel was visualized with a 1 kb ladder.
